# Supplementary material
Source: PubMed Central journal article supplement (PMC8029434)
Supplement: BPA-24-436-s001.pdf [file BPA-24-436-s001.pdf]

# Supplemental Figure 1.

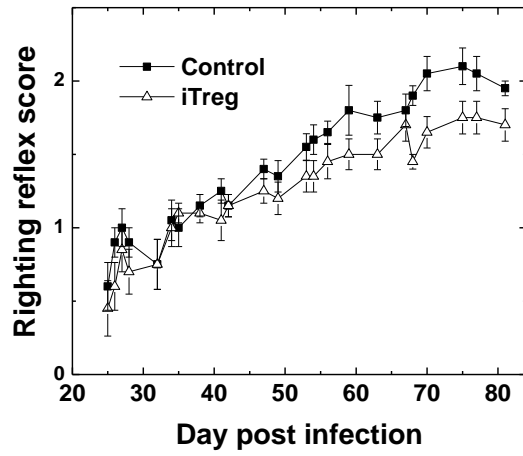

## Supplemental Figure 2.

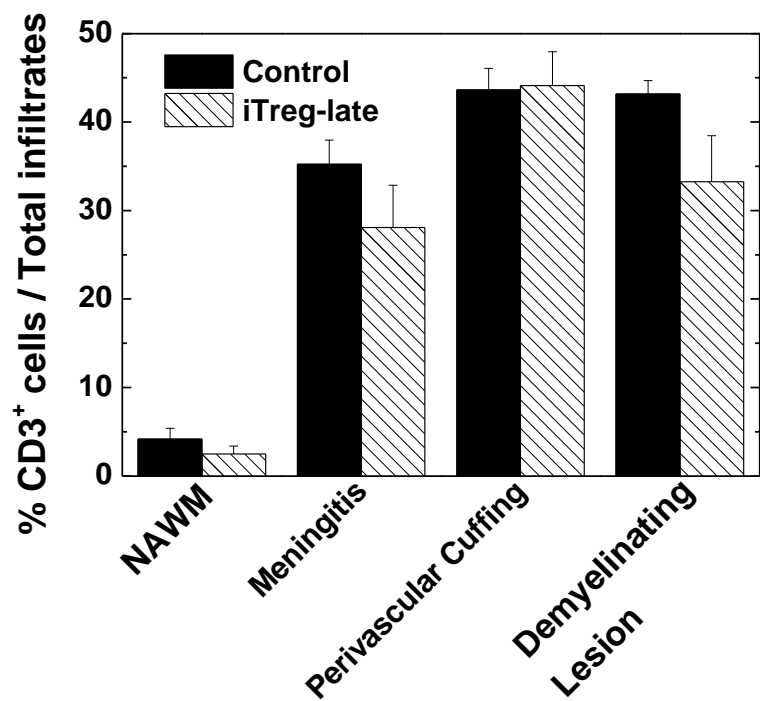

# Supplemental Figure 3.

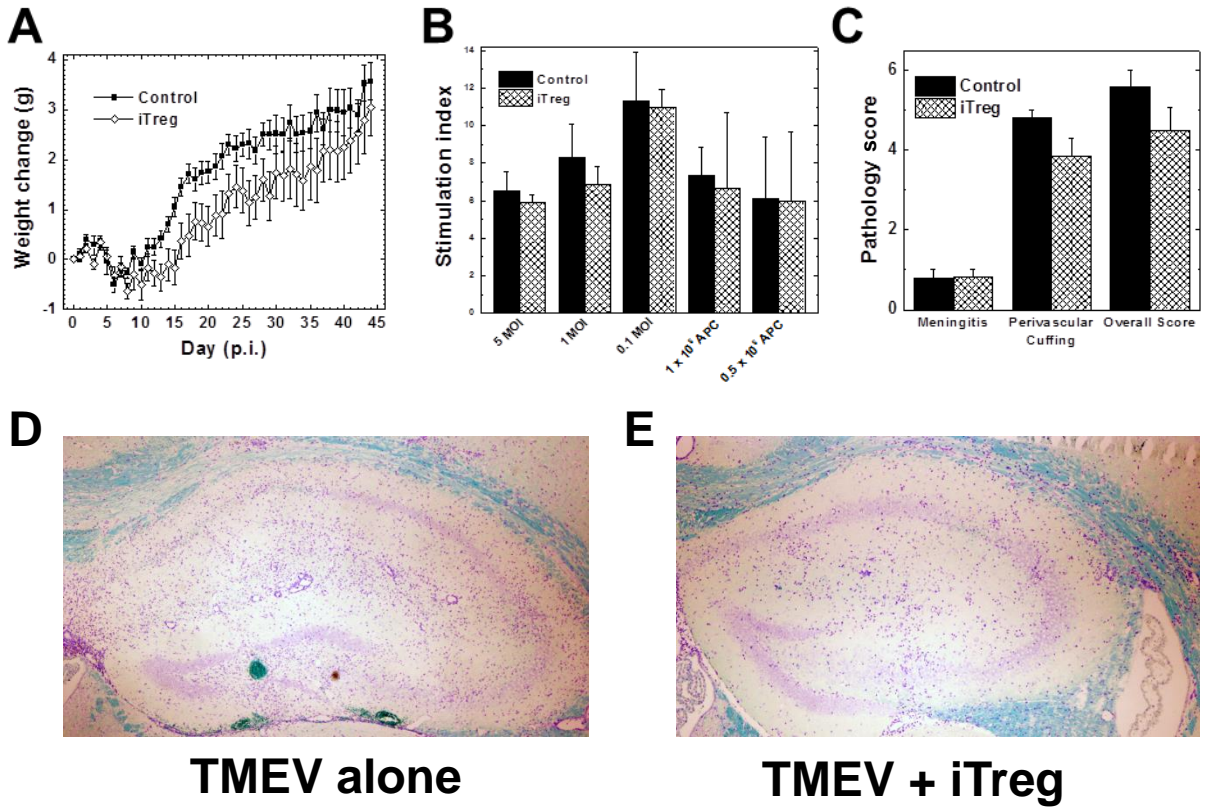

## Supplemental Figure 4.

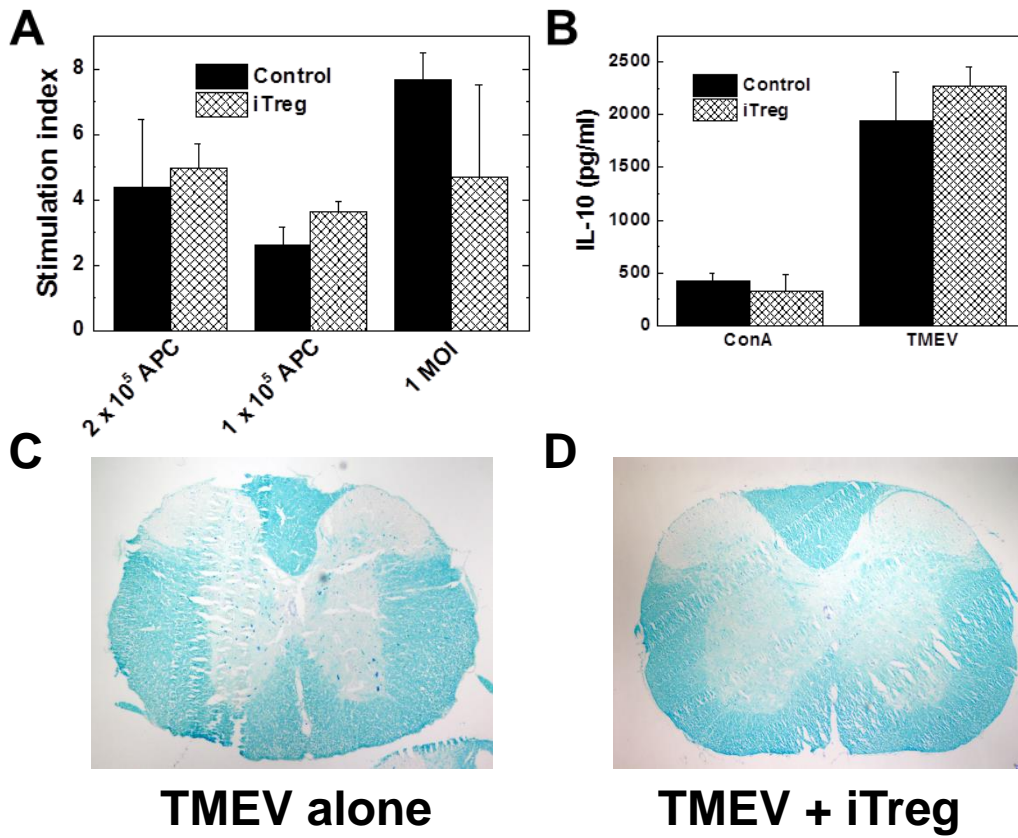

# Supplemental Table 1

**Supplemental Table 1.** Acute stage weight change and righting reflex scores

| Mouse group | Weight Change<br>Day 8 | Righting Reflex<br>Day 8 |
|-------------|------------------------|--------------------------|
| Control     | $0.8 \pm 0.3$          | 0                        |
| iTreg-Early | $-0.8 \pm 0.3$ *       | $0.9 \pm 0.2$ *          |

\*  $P < 0.05$
